# Supplementary material for: Haploidentical hematopoietic cell transplantation for adult acute myeloid leukemia: a position statement from the Acute Leukemia Working Party of the European Society for Blood and Marrow Transplantation
Source: PubMed Central journal article supplement — Haematologica. 2017 Sep 7;102(11):1810–22. doi: 10.3324/haematol.2017.176107 (PMC5664385; doi:10.3324/haematol.2017.176107), 2017-11
Supplement: 2017_176107-Disclosures_and_Contributions.pdf [file 2017_176107-Disclosures_and_Contributions.pdf]

Haematologica  
HAEMATOL/2017/176107  
Version 3

Haploidentical hematopoietic cell transplantation for adult acute  
myeloid leukemia: A position statement from the Acute Leukemia  
Working Party of the European Society for Blood and Marrow  
Transplantation

Catherine J Lee, Bipin N Savani, Mohamad Mohty, Myriam Labopin,  
Annalisa Ruggeri, Christoph Schmid, Frédéric Baron, Jordi Esteve,  
Norbert C Gorin, Sebastian Giebel, Fabio Ciceri, and Arnon Nagler

Disclosures: Conflict of interest/ disclosures: None

Contributions: AUTHORSHIP AND DISCLOSURES: Authors have no conflicts of interest to report. All authors designed the manuscript, analyzed the literature, wrote and commented on the manuscript. All authors approved submission of the manuscript for publication purposes.
